# Supplementary material
Source: publisher figshare collection journal article supplement (https://acs.figshare.com/ndownloader/files/5127214)
Supplement: Supplementary file 1 [file 5127214]

**Supporting Information Available**

**Elucidating Substrate Specificity and Condensation Domain Activity of FkbP, the  
FK520 Pipecolate-Incorporating Enzyme**

*Gregory J. Gatto, Jr.,<sup>§</sup> Shaun M. McLoughlin<sup>†</sup>, Neil L. Kelleher<sup>†</sup> and Christopher T.  
Walsh<sup>§\*</sup>*

<sup>§</sup> Department of Biological Chemistry and Molecular Pharmacology, Harvard Medical  
School, Boston, Massachusetts, 02115

<sup>†</sup> Department of Chemistry, University of Illinois, Urbana, Illinois, 61801

## Table of Contents

|                                    |           |
|------------------------------------|-----------|
| <b>Supplementary Figure 1.....</b> | <b>S3</b> |
| <b>Supplementary Figure 2.....</b> | <b>S4</b> |

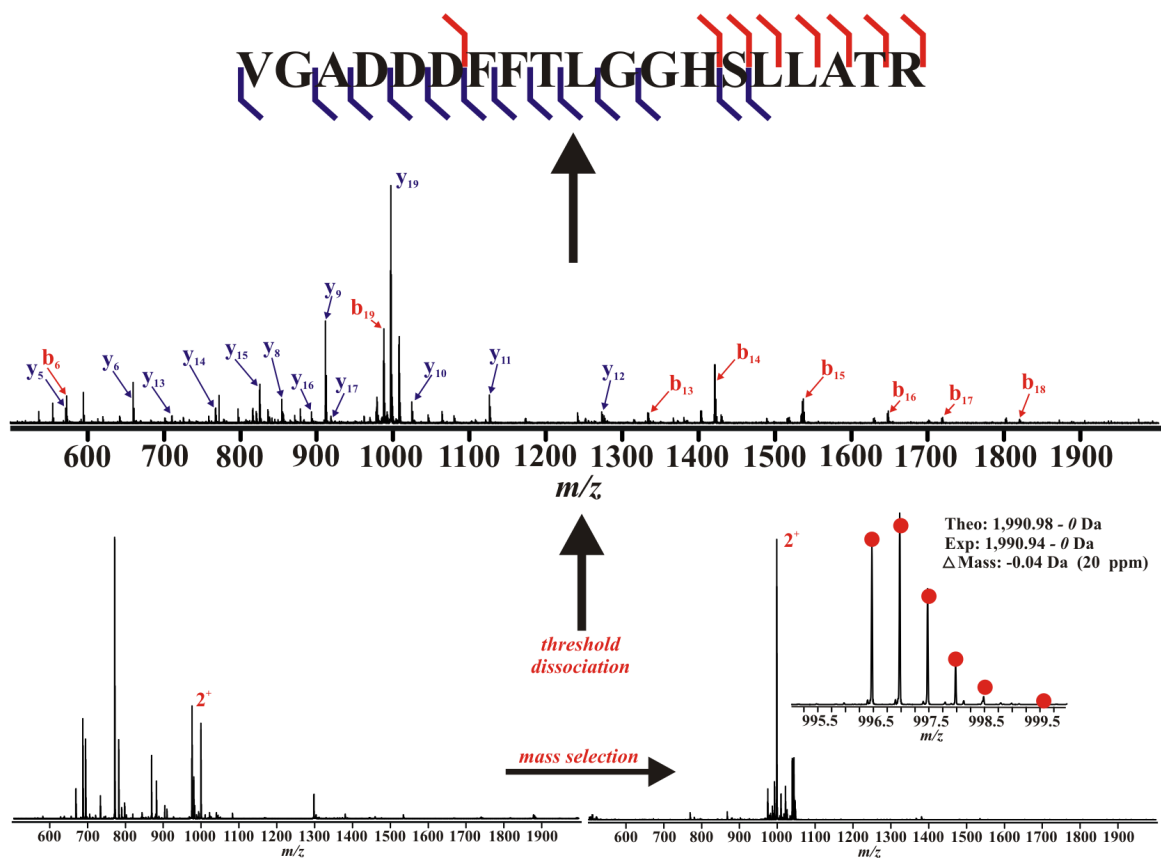

### SUPPORTING FIGURE 1:

Dissociation of the apo-form peptide harboring the active site serine. Irradiation with photons produced 8 b-ions and 13 y-ions, with two sequence tags 7 and 10 amino acids in length, respectively.

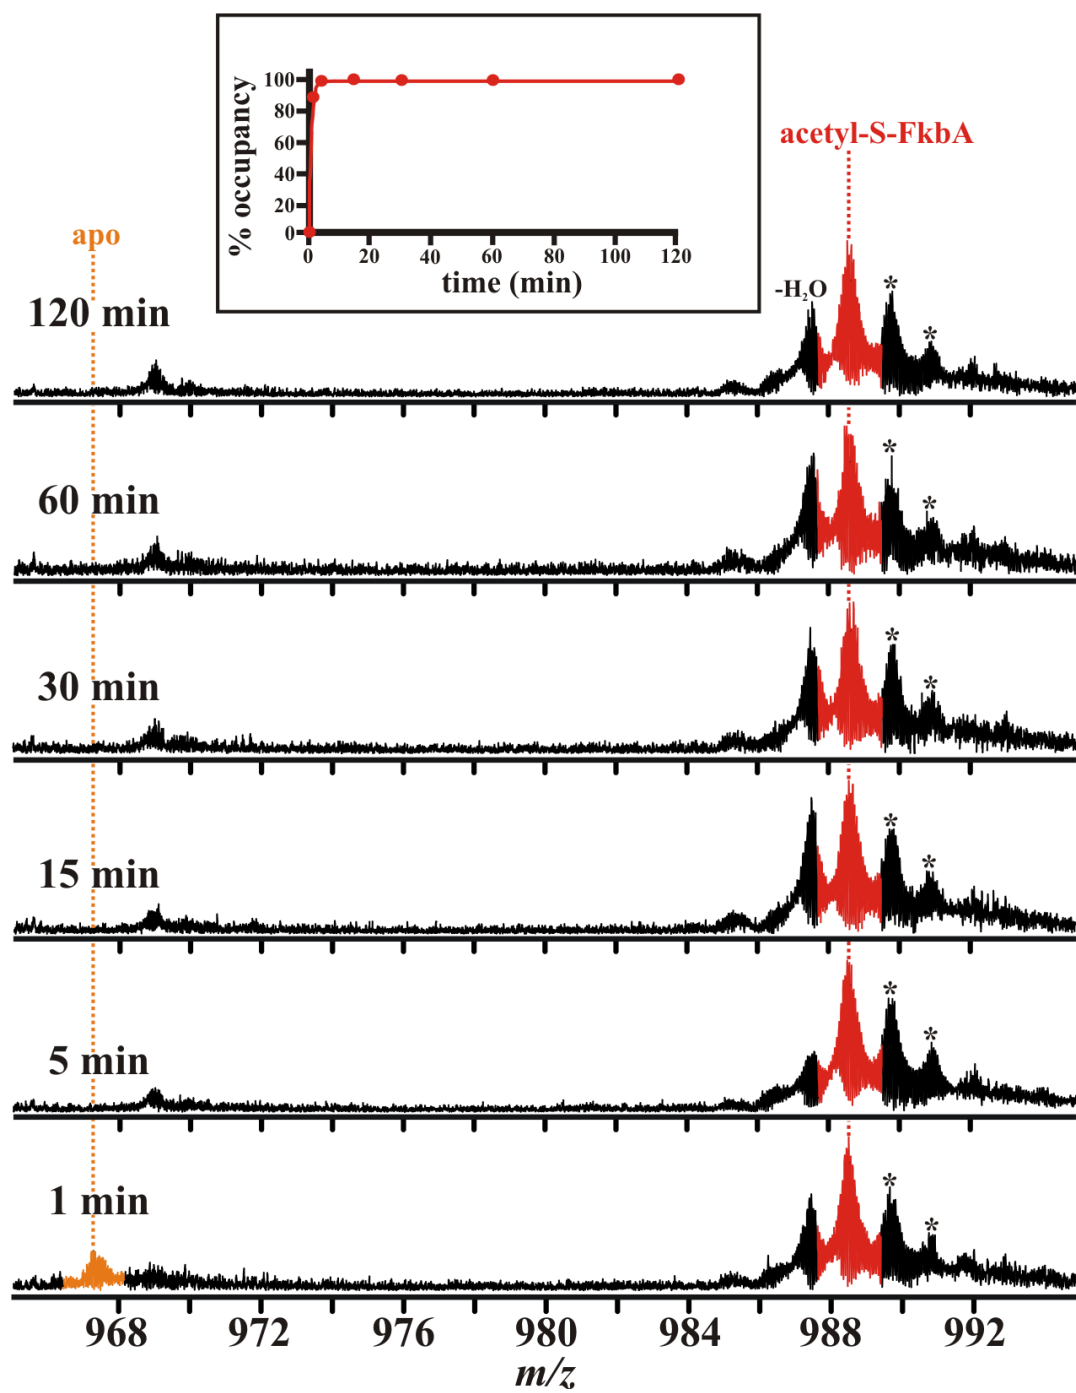

## SUPPORTING FIGURE 2:

Time course of FkbA loading with acetyl-CoA.
